# Supplementary material
Source: MDPI journal article supplement (https://www.mdpi.com/2073-4395/9/2/92)
Supplement: s1 [file s1]

## Supplementary: Selection of Salicylic Acid Tolerant Epilines in *Brassica napus*

Sonja Klemme <sup>1</sup>, Yorick De Smet <sup>1</sup>, Bruno P.A. Cammue <sup>2</sup>, and Marc De Block <sup>1,\*</sup>

<sup>1</sup> BASF Agricultural Solutions Belgium NV, Technologiepark 38, 9052 Ghent, Belgium; sonja.klemme@gmx.de (S.K.); yorick.desmet@agro.basf-se.com (Y.D.S.)

<sup>2</sup> Centre for Microbial & Plant Genetics, Department Microbial & Molecular Systems, University of Leuven, Kasteelpark Arenberg 20, 3001 Leuven, Belgium; bruno.cammue@kuleuven.vib.be

\* Correspondence: marc.deblock@agro.basf-se.com; Tel.: +32-9-250-8540

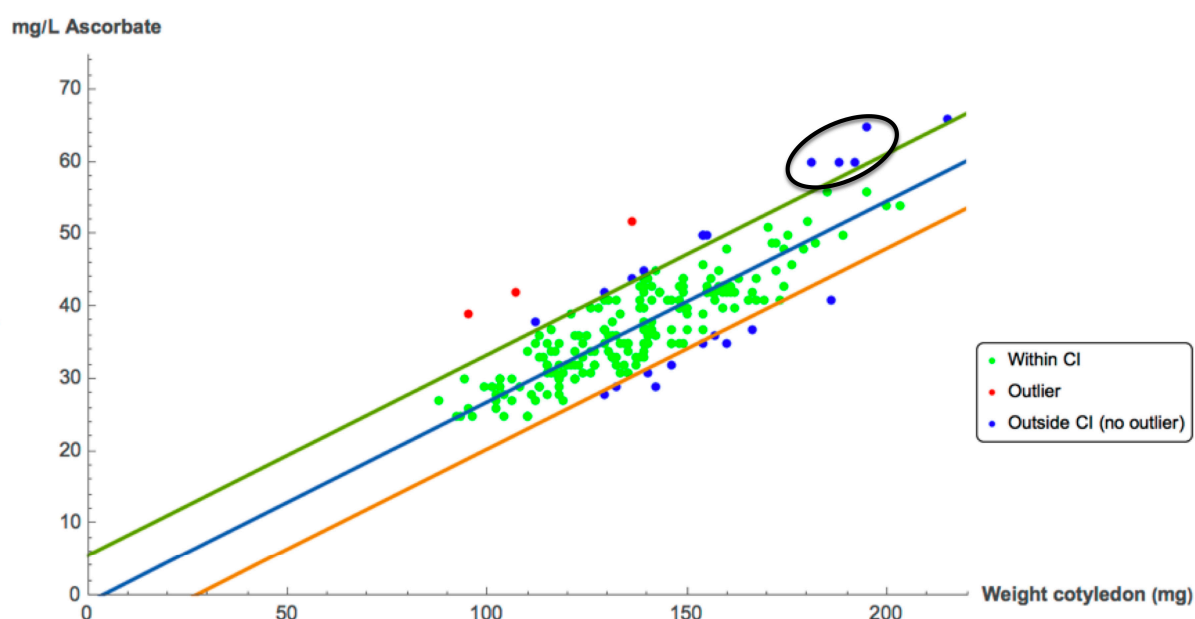

**Figure S1.** Graph showing the linear regression line with a 90% prediction interval for the ascorbate concentration and weight of cotyledons of a population of 200 seedlings treated with 50 mg/L SA. Seedlings with a high ascorbate concentration and weight falling above the 90% prediction interval were selected (black ellipse).

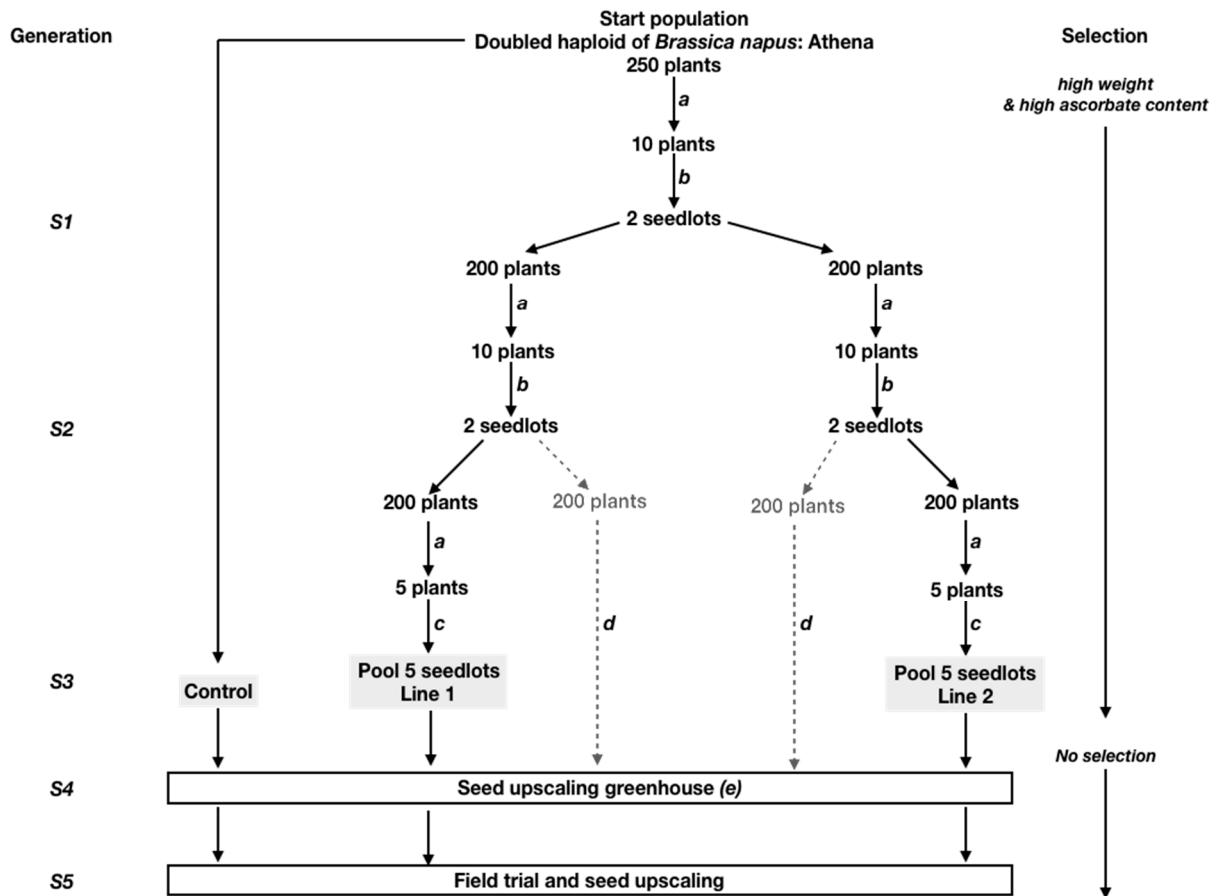

**Figure S2.** Scheme used to select epilines *Brassica napus* tolerant to SA.

- a. Populations were treated with 50 mg/L SA. Ten seedlings/population with a high ascorbate content and cotyledon weight falling above the 90% prediction interval of the regression line weight *versus* ascorbate concentration were selected (Figure S1) for seed production by self-fertilization.
- b. From the 10 seed lots, 75 seedlings/seed lot were tested for ascorbate concentration and weight. Two seed lots with the highest ascorbate concentration and weight of the cotyledons (after treatment with SA) were retained.
- c. In the last selection step, five seedlings with the highest ascorbate concentration and cotyledon weight (after SA treatment) were selected for seed production by self-fertilization. The five seed lots were pooled, resulting in Line 1 and Line 2.
- d. The same selection as in (c) was applied, but the lines were not studied further (molecular analyses, field trials).
- e. Seed up-scalings were done with 50 plants of both Line 1 and Line 2.

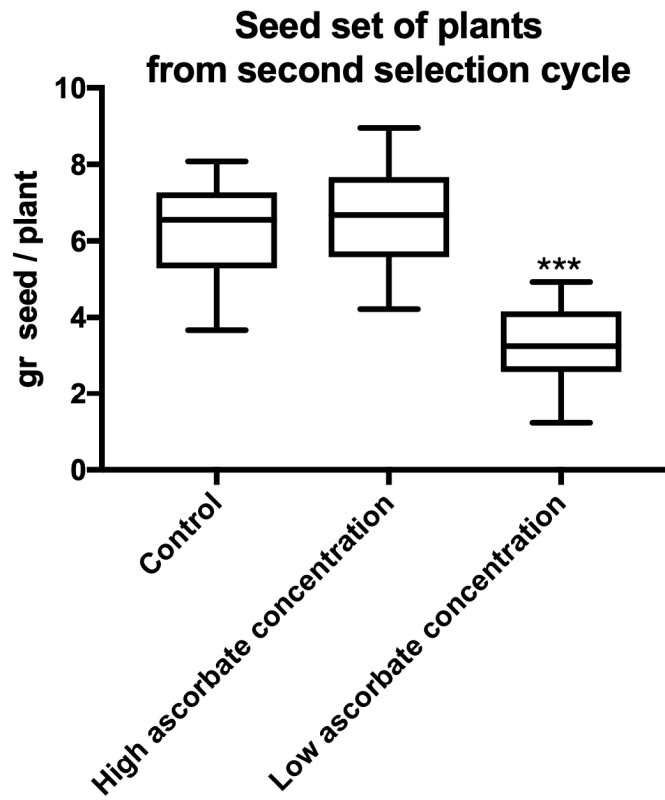

**Figure S3.** Seed set of plants obtained in second selection cycle (generation S2, Figure S2) and of not selected plants (control). Selection has been done for plants with cotyledons with a high weight and a high respectively low ascorbate concentration. Statistical significance *versus* control using one-way ANOVA with Dunnett's post-hoc test: \*\*\* P < 0.001

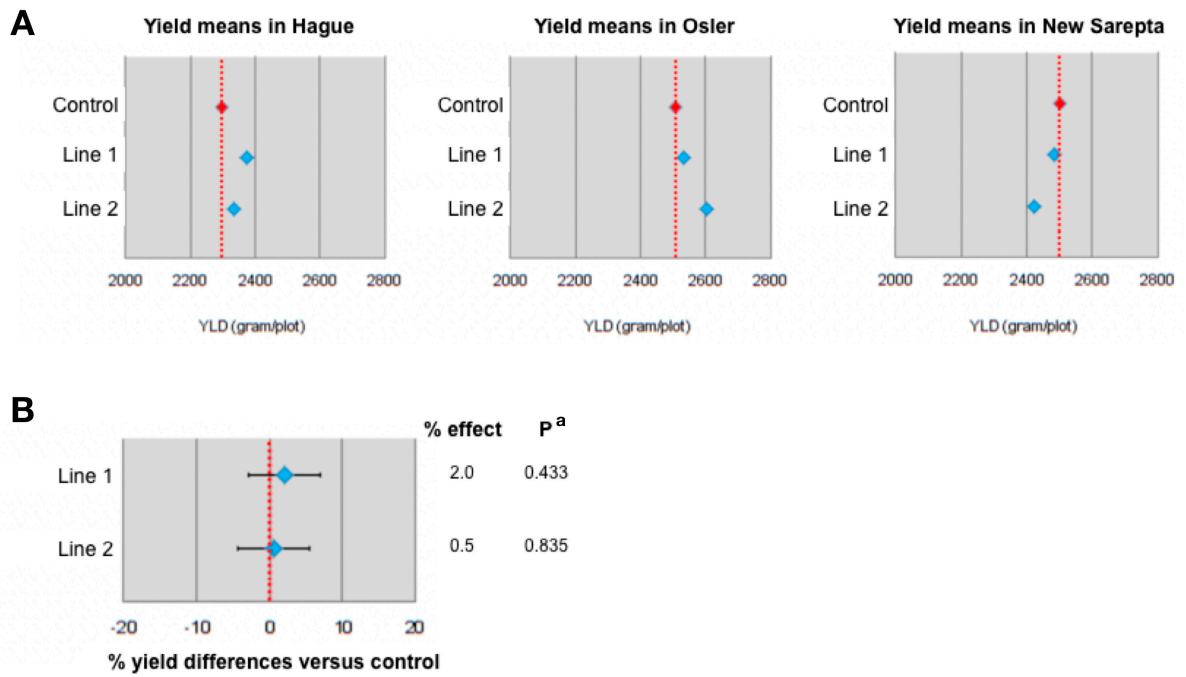

**Figure S4.** Seed yield of the selected Lines 1 and 2 compared to the control. (A) Yield means, of four repetitions, at the three locations in Canada. (B) The yield differences *versus* the control (red line).

<sup>a</sup> One-way ANOVA with Tukey's post-hoc test.

### SA induced genes

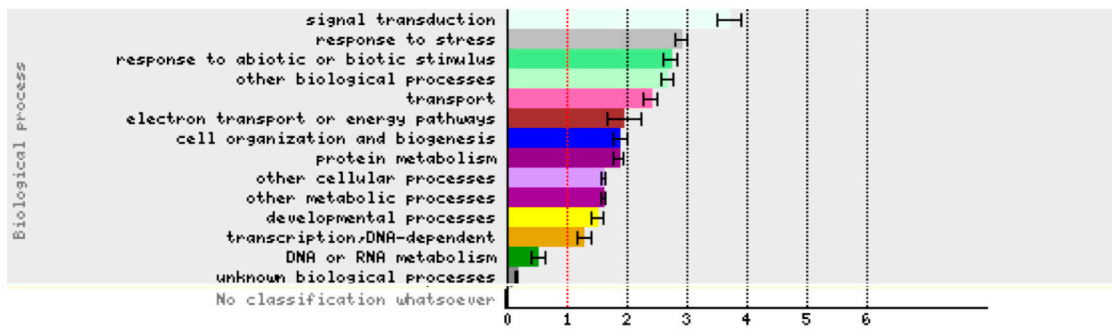

### SA repressed genes

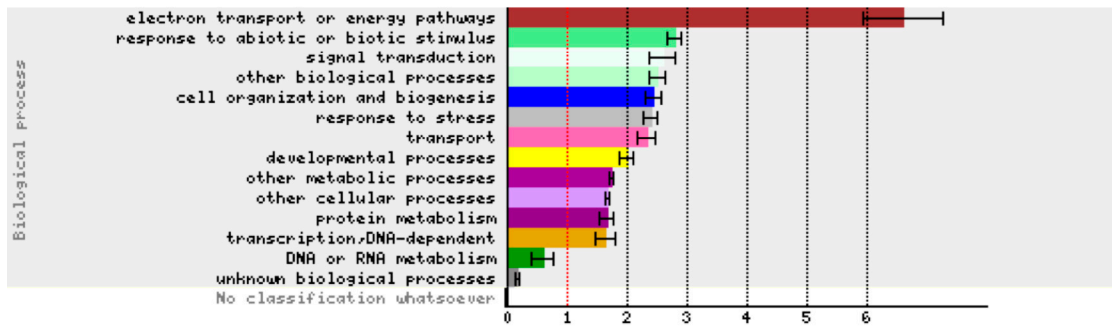

**Figure S5.** GO analysis. Annotated genes identified were analyzed with the PANTHER GO overrepresentation tool (<http://www.pantherdb.org/>) against *Arabidopsis thaliana* for overrepresentation *versus* a normalized sampling.

**Table S1.** Primers used for RT-qPCR

| Name              | Gene             | Sequence                |
|-------------------|------------------|-------------------------|
| PR1_1F            | PR1              | ccttgtagggagctcttgctc   |
| PR1_2R            |                  | ccccgaggatcatagttgc     |
| PR2_1F            | PR2              | cgggagaataggaacaacc     |
| PR2_1R            |                  | ccatactgggctgttgattg    |
| TIP41 forw603     | TIP41 like       | agatgaactggctgacaatgga  |
| tip41like rev 704 |                  | ccatcaactctaagccaaaatcg |
| WRKY70_3F         | WRKY70           | aagcttcaacagctcctctctc  |
| WRKY70_1R         |                  | ttctcttcattcatcgaggtc   |
| NIMIN1_1R         | NIMIN1           | tcttgctcctccttctttgc    |
| NIMIN1_2F         |                  | accaaaatgtggagatcaagg   |
| NIMIN2_1F         | NIMIN2           | tcggagatgaaagaggaacg    |
| NIMIN2_2R         |                  | gggttccggttgacagttaag   |
| EF1 forw 398      | EF1 <sup>o</sup> | tggtggttttgaggctggat    |
| EF1 rev 507       |                  | catccatctgttacagcagcaa  |

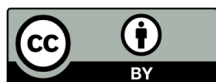

© 2018 by the authors. Licensee MDPI, Basel, Switzerland. This article is an open access article distributed under the terms and conditions of the Creative Commons Attribution (CC BY) license (<http://creativecommons.org/licenses/by/4.0/>).
